# Supplementary material
Source: PubMed Central journal article supplement (PMC3249374)
Supplement: supp_111.132720_TableS1.pdf [file supp_111.132720_TableS1.pdf]

**Table S1 Primers used for amplification of target genes.**

| Primer Name | Sequence (5'-3')                  |
|-------------|-----------------------------------|
| PhR322F     | GATCCACGTCGGTACCCGGGGGATC         |
| PhR322R     | GATCGCGATCGCAAGCTTGCAAATTAAGCC    |
| RAP1f       | TTAAGCGGCCGCATACGCAACCGCCCTACATAA |
| RAP1r       | TCTACATATGCGTGAATCAGTGAAATAAAGG   |
| SOK2f       | TTAAGCGGCCGCTATAACCCTGGTAAGGCCTT  |
| SOK2r       | TCTACATATGGGCGGTAGGGTTTTGATTAA    |
