# Supplementary material
Source: PubMed Central journal article supplement (PMC3249374)
Supplement: supp_111.132720_TableS2.pdf [file supp_111.132720_TableS2.pdf]

**Table S2 Target genes and primers for QRT-PCR**

| Gene ID | Forward primer (5'-3')  | Reverse primer (5'-3') |
|---------|-------------------------|------------------------|
| ADH2    | TTCAAGCCGCTCACATTCC     | CACAAGATTGGCGCGACTT    |
| ALD4    | TTGTGGGTGAGGCCATTACA    | ACCCTGTGAAGGCAACCTTTT  |
| ARO10   | AGTGTTGAATCAGCTGGCCTAAG | CATAAGCGGCGTTTCAGTTCAT |
| ATF2    | GTTCCGGCCTAAACGTTTGCT   | CCACGCTCATGTCCATGTTC   |
| BAT1    | CCATGTTCCGTCCGGATAAG    | CAAACAAATTCTAGCGGCAG   |
| BAT2    | AATCTGTTTGCCAACGTTCGA   | TGCTGGATCAGTTTCCAATT   |
| ERG10   | CGTGCGGGTGCCAAAT        | CCATCTCTTTCGACACCATCAA |
| ERG13   | GATCGGTCCTGATGCTCCAA    | CGTAGGCGTGTTCCATGTAAGA |
| HAT2    | TGCCCGCAACCTTTCAA       | GGCCGCAAGGAGGTTTG      |
| ILV3    | CGTCCCAGGCCATGCTT       | CCCGACTTGAGGCTTCTTGA   |
| RAP1    | ATTGGATCCGAGTATGGTCGTT  | TCCGATGGCGCTGTGACT     |
| SOK2    | TCAACCTCTGATGCCCGTATC   | GCGGGTACGGCCACTGT      |
| THI3    | GGCGTGCCCGGATCTTA       | GGCGGCATACCCACTATGTG   |
| YJL218W | GGTCATCCAATTGACGTGGAA   | GGTCACAGGCATGGCATATTC  |
