# Supplementary material
Source: PubMed Central journal article supplement (PMC3249374)
Supplement: supp_111.132720_TableS3.pdf [file supp_111.132720_TableS3.pdf]

**Table S3 Sok2p and Rap1p activity with reference to the target genes in figure 2.**

|         | SOK2 | RAP1 |
|---------|------|------|
| ADH2    | ✓    | X    |
| ALD4    | ✓    | ✓    |
| ARO10   | ✓    | ✓    |
| ATF2    | ✓    | ✓    |
| BAT1    | ✓    | X    |
| BAT2    | ✓    | ✓    |
| ERG10   | X    | X    |
| ERG13   | X    | ✓    |
| HAT2    | X    | ✓    |
| ILV3    | ✓    | X    |
| THI3    | X    | X    |
| YJL218W | X    | ✓    |
| RAP1    | X    | n/a  |
| SOK2    | n/a  | ✓    |

Transcription factor activity is based on reported interaction studies by Vachova *et al.* (2004), Chua *et al.* (2006), Workman *et al.* (2006), Kasahara *et al.* (2007) and Yarragudi *et al.* (2007). Tic marks indicate evidence for regulation whereas X's are used where no evidence for regulation of the target gene by the transcription factor in question has been reported.
