# Supplementary material
Source: PubMed Central journal article supplement (PMC3249374)
Supplement: supp_111.132720_TableS4.pdf [file supp_111.132720_TableS4.pdf]

**Table S4 Volatile alcohols and esters present in the fermentation media at day 2 of fermentation.**

| DAY2                  | VIN13        | SOK2-VIN13          | BM45         | RAP1-BM45          | DV10         |
|-----------------------|--------------|---------------------|--------------|--------------------|--------------|
| Ethyl Acetate         | 5.53 ± 1.40  | 5.70 ± 1.20         | 7.60 ± 0.71  | 6.14 ± 2.16        | 8.10 ± 2.13  |
| Propanol              | 33.24 ± 4.38 | 34.25 ± 3.19        | 32.81 ± 1.18 | 27.25 ± 1.37       | 28.39 ± 5.21 |
| Isobutanol            | 5.78 ± 0.71  | <b>8.71 ± 0.74</b>  | 9.26 ± 0.70  | 8.20 ± 1.70        | 6.20 ± 1.62  |
| Isoamyl Acetate       | 0.10 ± 0.11  | <b>0.31 ± 0.02</b>  | 0.18 ± 0.11  | 0.24 ± 0.11        | 0.17 ± 0.17  |
| Butanol               | 0.16 ± 0.2   | <b>0.41 ± 0.12</b>  | Bd           | Bd                 | Bd           |
| Isoamyl alcohol       | 32.58 ± 5.74 | 37.27 ± 3.82        | 37.80 ± 2.90 | 35.85 ± 3.30       | 32.78 ± 3.61 |
| Ethyl Hexanoate       | Bd           | bd                  | Bd           | Bd                 | 0.17 ± 0.17  |
| Hexanol               | Bd           | bd                  | Bd           | Bd                 | Bd           |
| Ethyl Caprylate       | 0.05 ± 0.04  | 0.09 ± 0.01         | 0.10 ± 0.02  | 0.11 ± 0.03        | 0.11 ± 0.03  |
| Acetic Acid           | 449.5 ± 17.8 | <b>525.2 ± 26.2</b> | 715.3 ± 18.9 | <i>658.8 ± 7.0</i> | 618.4 ± 15.4 |
| Propionic Acid        | 2.23 ± 0.15  | 2.47 ± 0.18         | 2.04 ± 0.19  | 2.15 ± 0.23        | 2.38 ± 0.31  |
| Iso-Butyric Acid      | 0.78 ± 0.04  | 0.71 ± 0.02         | 0.79 ± 0.06  | 0.68 ± 0.04        | 0.80 ± 0.06  |
| Butyric Acid          | 0.55 ± 0.04  | 0.52 ± 0.01         | 0.58 ± 0.05  | 0.57 ± 0.01        | 0.67 ± 0.02  |
| Ethyl Caprate         | 0.08 ± 0.016 | 0.09 ± 0.02         | 0.12 ± 0.04  | 0.16 ± 0.06        | 0.10 ± 0.02  |
| Iso-Valeric Acid      | 0.45 ± 0.03  | 0.37 ± 0.01         | 0.47 ± 0.08  | <i>0.33 ± 0.04</i> | 0.38 ± 0.06  |
| Diethyl Succinate     | Bd           | bd                  | Bd           | Bd                 | Bd           |
| Valeric Acid          | Bd           | bd                  | Bd           | Bd                 | Bd           |
| 2-Phenylethyl Acetate | Bd           | bd                  | Bd           | Bd                 | Bd           |
| Hexanoic Acid         | 0.73 ± 0.03  | <b>0.85 ± 0.07</b>  | 0.94 ± 0.13  | 1.05 ± 0.15        | 1.39 ± 0.07  |
| 2-Phenyl Ethanol      | 6.42 ± 0.47  | 7.11 ± 0.69         | 9.64 ± 0.35  | <i>7.57 ± 0.78</i> | 7.49 ± 0.50  |
| Octanoic Acid         | 0.76 ± 0.15  | 1.14 ± 0.26         | 1.25 ± 0.64  | 1.03 ± 0.10        | 3.05 ± 0.92  |
| Decanoic Acid         | 2.54 ± 0.19  | 2.34 ± 0.26         | 2.73 ± 0.12  | 2.95 ± 0.38        | 3.33 ± 0.09  |

All values are expressed in mg.L<sup>-1</sup> and are the average of 4 biological repeats ± standard deviation. Metabolites present at concentrations below the detection limit are indicated by “Bd”. Values in bold indicate a statistically significant increase in concentration for a given metabolite relative to the untransformed control, whereas values in italics indicate a significant decrease in concentration.
