# Supplementary material
Source: PubMed Central journal article supplement (PMC3249374)
Supplement: supp_111.132720_TableS5.pdf [file supp_111.132720_TableS5.pdf]

**Table S5 Volatile alcohols and esters present in the fermentation media at day 5 of fermentation.**

| DAY5                  | VIN13        | SOK2-VIN13            | BM45          | RAP1-BM45          | DV10          |
|-----------------------|--------------|-----------------------|---------------|--------------------|---------------|
| Ethyl Acetate         | 19.74 ± 2.48 | 22.52 ± 2.65          | 20.52 ± 1.13  | 19.38 ± 0.95       | 28.38 ± 1.69  |
| Propanol              | 70.22 ± 2.34 | <b>82.06 ± 4.97</b>   | 48.65 ± 3.43  | 44.66 ± 3.02       | 66.88 ± 5.64  |
| Isobutanol            | 12.97 ± 1.95 | <b>18.17 ± 1.84</b>   | 20.14 ± 1.96  | 17.29 ± 1.55       | 16.42 ± 1.81  |
| Isoamyl Acetate       | 0.30 ± 0.09  | <b>0.70 ± 0.17</b>    | 0.36 ± 0.02   | 0.36 ± 0.04        | 0.38 ± 0.09   |
| Butanol               | 0.59 ± 0.09  | <b>0.88 ± 0.04</b>    | 0.52 ± 0.03   | 0.58 ± 0.04        | 0.69 ± 0.05   |
| Isoamyl alcohol       | 78.74 ± 4.54 | <b>106.80 ± 8.47</b>  | 85.54 ± 4.69  | 89.53 ± 2.01       | 95.87 ± 7.52  |
| Ethyl Hexanoate       | 0.11 ± 0.18  | 0.15 ± 0.01           | 0.16 ± 0.16   | 0.10 ± 0.08        | 0.18 ± 0.05   |
| Hexanol               | Bd           | bd                    | Bd            | bd                 | Bd            |
| Ethyl Caprylate       | 0.11 ± 0.04  | 0.12 ± 0.01           | 0.14 ± 0.00   | <i>0.10 ± 0.01</i> | 0.15 ± 0.03   |
| Acetic Acid           | 792.6 ± 16.4 | <b>1047.3 ± 72.87</b> | 1131.1 ± 44.0 | 1159.9 ± 113.6     | 1093.2 ± 81.7 |
| Propionic Acid        | 4.58 ± 0.42  | <b>6.56 ± 0.44</b>    | 2.62 ± 0.10   | 2.78 ± 0.28        | 5.05 ± 0.39   |
| Iso-Butyric Acid      | 0.83 ± 0.03  | 0.87 ± 0.05           | 0.90 ± 0.05   | 0.81 ± 0.06        | 0.89 ± 0.06   |
| Butyric Acid          | 0.65 ± 0.08  | 0.67 ± 0.05           | 0.68 ± 0.04   | 0.71 ± 0.05        | 0.80 ± 0.08   |
| Ethyl Caprate         | 0.24 ± 0.05  | <b>0.35 ± 0.03</b>    | 0.30 ± 0.04   | 0.33 ± 0.07        | 0.46 ± 0.03   |
| Iso-Valeric Acid      | 0.65 ± 0.07  | 0.66 ± 0.04           | 0.62 ± 0.09   | 0.50 ± 0.06        | 0.64 ± 0.06   |
| Diethyl Succinate     | 0.03 ± 0.05  | <b>0.14 ± 0.03</b>    | 0.10 ± 0.00   | <b>0.15 ± 0.00</b> | 0.11 ± 0.01   |
| Valeric Acid          | 0.02 ± 0.03  | 0.06 ± 0.01           | 0.02 ± 0.02   | <b>0.07 ± 0.00</b> | 0.05 ± 0.00   |
| 2-Phenylethyl Acetate | 0.01 ± 0.67  | 0.04 ± 0.00           | 0.03 ± 0.60   | 0.02 ± 0.01        | 0.03 ± 0.04   |
| Hexanoic Acid         | 1.11 ± 0.17  | 1.40 ± 0.16           | 1.37 ± 0.28   | 1.56 ± 0.32        | 2.19 ± 0.24   |
| 2-Phenyl Ethanol      | 10.74 ± 0.68 | <b>14.62 ± 0.84</b>   | 12.66 ± 0.66  | 13.10 ± 2.10       | 13.52 ± 1.25  |
| Octanoic Acid         | 1.38 ± 0.08  | <b>1.65 ± 0.13</b>    | 1.34 ± 0.21   | 1.28 ± 0.09        | 2.65 ± 0.12   |
| Decanoic Acid         | 2.80 ± 0.17  | 3.28 ± 0.21           | 2.98 ± 0.39   | 3.80 ± 0.14        | 4.50 ± 0.29   |

All values are expressed in mg.L<sup>-1</sup> and are the average of 4 biological repeats ± standard deviation. Metabolites present at concentrations below the detection limit are indicated by “bd”. Values in bold indicate a statistically significant increase in concentration for a given metabolite relative to the untransformed control, whereas values in italics indicate a significant decrease in concentration.
