# Supplementary material
Source: PubMed Central journal article supplement (PMC3249374)
Supplement: supp_111.132720_TableS6.pdf [file supp_111.132720_TableS6.pdf]

**Table S6 Volatile alcohols and esters present in the fermentation media at day 14 of fermentation.**

| DAY14                 | VIN13        | SOK2-VIN13           | BM45           | RAP1-BM45           | DV10           |
|-----------------------|--------------|----------------------|----------------|---------------------|----------------|
| Ethyl Acetate         | 31.39 ± 0.66 | 28.09 ± 1.41         | 27.11 ± 2.85   | 23.88 ± 0.99        | 33.18 ± 0.43   |
| Propanol              | 76.48 ± 3.09 | 83.37 ± 6.25         | 45.60 ± 1.21   | 41.53 ± 4.01        | 69.52 ± 5.30   |
| Isobutanol            | 19.00 ± 1.74 | <b>24.96 ± 0.53</b>  | 25.88 ± 2.81   | 22.42 ± 1.65        | 21.27 ± 3.07   |
| Isoamyl Acetate       | 0.34 ± 0.04  | <b>0.73 ± 0.02</b>   | 0.43 ± 0.03    | 0.40 ± 0.04         | 0.43 ± 0.11    |
| Butanol               | 1.07 ± 0.07  | <b>1.33 ± 0.04</b>   | 0.58 ± 0.06    | <b>0.70 ± 0.05</b>  | 0.87 ± 0.06    |
| Isoamyl alcohol       | 106.8 ± 9.37 | <b>132.74 ± 7.57</b> | 104.61 ± 3.42  | 108.09 ± 7.01       | 113.69 ± 11.49 |
| Ethyl Hexanoate       | 0.22 ± 0.19  | 0.36 ± 0.01          | 0.35 ± 0.01    | <i>0.19 ± 0.02</i>  | 0.39 ± 0.03    |
| Hexanol               | Bd           | 0.01 ± 0.01          | Bd             | <b>0.35 ± 0.02</b>  | Bd             |
| Ethyl Caprylate       | 0.15 ± 0.02  | <b>0.26 ± 0.02</b>   | 0.24 ± 0.04    | 0.23 ± 0.05         | 0.29 ± 0.03    |
| Acetic Acid           | 926.9 ± 50.2 | <b>1182.9 ± 87.8</b> | 1154.6 ± 112.7 | 1263.2 ± 85.9       | 1261.0 ± 47.1  |
| Propionic Acid        | 6.05 ± 0.48  | <b>7.93 ± 0.63</b>   | 2.81 ± 0.17    | <b>5.07 ± 0.42</b>  | 8.01 ± 0.22    |
| Iso-Butyric Acid      | 0.76 ± 0.03  | <b>0.96 ± 0.04</b>   | 0.96 ± 0.07    | 0.86 ± 0.03         | 1.02 ± 0.10    |
| Butyric Acid          | 0.49 ± 0.04  | <b>0.59 ± 0.02</b>   | 0.61 ± 0.04    | 0.63 ± 0.06         | 0.75 ± 0.01    |
| Ethyl Caprate         | 0.32 ± 0.04  | <b>0.47 ± 0.05</b>   | 0.43 ± 0.04    | 0.50 ± 0.09         | 0.59 ± 0.04    |
| Iso-Valeric Acid      | 0.84 ± 0.01  | 0.87 ± 0.04          | 0.79 ± 0.09    | 0.67 ± 0.07         | 0.91 ± 0.12    |
| Diethyl Succinate     | Bd           | 0.07 ± 0.03          | Bd             | <b>0.11 ± 0.04</b>  | 0.05 ± 0.05    |
| Valeric Acid          | Bd           | bd                   | Bd             | <b>0.22 ± 0.15</b>  | 0.01 ± 0.01    |
| 2-Phenylethyl Acetate | 0.03 ± 0.02  | 0.06 ± 0.00          | 0.04 ± 0.01    | 0.02 ± 0.01         | 0.04 ± 0.01    |
| Hexanoic Acid         | 1.53 ± 0.08  | <b>2.28 ± 0.28</b>   | 2.56 ± 0.60    | 2.76 ± 0.30         | 3.28 ± 0.51    |
| 2-Phenyl Ethanol      | 13.68 ± 0.88 | <b>20.43 ± 1.54</b>  | 15.16 ± 0.74   | <i>12.93 ± 0.83</i> | 16.07 ± 0.69   |
| Octanoic Acid         | 1.15 ± 0.06  | 1.31 ± 0.11          | 1.13 ± 0.19    | 1.25 ± 0.29         | 1.93 ± 0.15    |
| Decanoic Acid         | 2.18 ± 0.04  | 2.38 ± 0.11          | 1.95 ± 0.16    | 2.34 ± 0.21         | 3.45 ± 0.12    |

All values are expressed in mg.L<sup>-1</sup> and are the average of 4 biological repeats ± standard deviation. Metabolites present at concentrations below the detection limit are indicated by “bd”. Values in bold indicate a statistically significant increase in concentration for a given metabolite relative to the untransformed control, whereas values in italics indicate a significant decrease in concentration.
