# Supplementary material
Source: PubMed Central journal article supplement (PMC3249374)
Supplement: supp_111.132720_TableS7.pdf [file supp_111.132720_TableS7.pdf]

**Table S7 GO categorisation of differentially expressed transcripts with a fold change greater than or equal to 2 (i.e. up-regulated genes).**

| Category                                                                                                          | p-value | In Category from Cluster                                                                                                                                                                                                                                                                                                                                                                          | k  | f   |
|-------------------------------------------------------------------------------------------------------------------|---------|---------------------------------------------------------------------------------------------------------------------------------------------------------------------------------------------------------------------------------------------------------------------------------------------------------------------------------------------------------------------------------------------------|----|-----|
| ribosome biogenesis<br>[GO:0042254]                                                                               | <1e-14  | RPS9B ENP1 SPB1 PWP2 NOP1 NOP14 NHP2 RLI1 UTP4 UTP5 SNU13<br>TMA20 NSA2 SPB4 LOC1 CGR1 DBP3 ROK1 SLX9 UTP8 CIC1 RRP3 GAR1<br>IMP3 RIX1 UTP18 UTP10 ALB1 MRT4 URB1 EBP2 RPL40B SOF1 RLP24<br>SDO1 DIP2 CBF5 EMG1 NOP56 UTP13 DBP9 UTP21 ERB1 UTP15 RRB1<br>HAS1 NOP2 DBP2 NOG2 ESF2 NOP12 BRX1 NOC2 PUS7 YTM1 RRS1<br>NOP58 RRP12 RPS9A NOG1 NIP7 RRP9                                             | 62 | 184 |
| regulation of translation<br>[GO:0006417]                                                                         | <1e-14  | RBG1 URA7 ILS1 RPS11B RPG1 GRS1 RPS9B ARO4 SRO9 THR4 RPL13A<br>SSB1 RPL4B RPS11A RLI1 RPL12A RPS8B YGR054W VAS1 TIF4631 ADE3<br>RPS0A MES1 RPL14B IMD2 RPS24B THS1 URA2 RPL17B SUI2 TEF4 EAP1<br>GCN3 DPS1 FRS1 SAM1 PWP1 IMD3 RPS1A RPL6B IMD4 RPL6A NIP1<br>DBP2 SSB2 RPL18B WRS1 PRT1 RPS9A CDC60 NEW1 TIF5 TKL1                                                                               | 53 | 172 |
| cellular amino acid and<br>derivative metabolic process<br>[GO:0006519]                                           | 3.5E-14 | ILS1 ADH5 HIS7 ARO4 ILV6 LYS21 GGC1 KRS1 TRP4 HOM3 HIS1 ILV1<br>TRP2 TRP5 ARO2 ARO8 ASN2 LYS1 ACO2 TRP3 SAM1 ATR1 ARG7 ADE4<br>ARG1 LEU9 ORT1 HIS3 SAM4 YMC1 ASN1                                                                                                                                                                                                                                 | 31 | 71  |
| cellular amino acid biosynthetic<br>process [GO:0008652]                                                          | 1.7E-13 | LYS2 HIS7 ARO4 ILV6 THR4 LYS21 LYS4 TRP4 PRO3 HOM3 HIS1 SER3 ILV1<br>TRP2 IRC7 TRP5 ARO2 ASN2 ADE3 SER2 THR1 LYS12 LYS1 ARG3 MDE1<br>TRP3 ILV5 YML096W ARG7 LYS9 ARG1 LEU9 ORT1 HIS3 PRO2 SAM4<br>ARO7 ASN1                                                                                                                                                                                       | 38 | 107 |
| nitrogen compound metabolic<br>process [GO:0006807]                                                               | 3.2E-13 | ILS1 ADH5 HIS7 ARO4 ILV6 LYS21 GGC1 KRS1 TRP4 HOM3 HIS1 ILV1<br>TRP2 TRP5 ARO2 ARO8 ASN2 ADE3 NIT1 LYS1 URA2 ACO2 TRP3 SHM2<br>SAM1 ATR1 ARG7 ADE4 ARG1 LEU9 ORT1 HIS3 SAM4 YMC1 ASN1                                                                                                                                                                                                             | 35 | 94  |
| cellular aromatic compound<br>metabolic process<br>[GO:0006725]                                                   | 6.3E-13 | ADH5 HIS7 ARO4 ILV6 LYS21 GGC1 KRS1 TRP4 HOM3 HIS1 ILV1 TRP2<br>TRP5 YGL039W ARO2 ARO8 ASN2 LYS1 ACO2 TRP3 ATR1 ARG7 ARG1<br>LEU9 ORT1 HIS3 SAM4 YMC1 ASN1                                                                                                                                                                                                                                        | 29 | 68  |
| organic acid metabolic process<br>[GO:0006082]                                                                    | 2.0E-11 | ADH5 HIS7 ARO4 ILV6 LYS21 GGC1 KRS1 TRP4 HOM3 HIS1 ILV1 TRP2<br>TRP5 ARO2 ARO8 ASN2 LYS1 ACO2 MAE1 TRP3 SAM1 ATR1 ARG7 ARG1<br>LEU9 ORT1 HIS3 SAM4 YMC1 ASN1                                                                                                                                                                                                                                      | 30 | 81  |
| maturation of SSU-rRNA from<br>tricistronic rRNA transcript<br>(SSU-rRNA, 5.8S rRNA, LSU-<br>rRNA) [GO:0000462]   | 4.3E-10 | RPS11B RPS9B PWP2 NOP1 NOP14 RPS11A UTP4 UTP5 SNU13 RPS8B<br>PRP43 SLX9 UTP8 EFG1 RRP3 RPS24B UTP25 UTP10 SOF1 DIP2 NOP56<br>UTP13 TSR2 RPS1A UTP15 RRP12 RPS9A                                                                                                                                                                                                                                   | 27 | 75  |
| tRNA aminoacylation for<br>protein translation<br>[GO:0006418]                                                    | 6.3E-09 | ILS1 GRS1 SES1 KRS1 FRS2 ARC1 VAS1 TYS1 MES1 DED81 YHR020W<br>THS1 DPS1 YNL247W WRS1 GLN4 CDC60                                                                                                                                                                                                                                                                                                   | 17 | 36  |
| metabolic process<br>[GO:0008152]                                                                                 | 2.7E-08 | BNA4 LYS2 ADH5 HIS7 ARO4 MAL32 ILV6 THR4 SLC1 QRI1 LYS21 PHO13<br>LYS4 EXG2 TRP4 URH1 URA3 UTR2 HPA3 PRO3 SAH1 HOM3 SER3 ILV1<br>TRP5 SCW11 YGL039W ARI1 CRH1 ADE3 SER2 ARD1 PAN5 IMD2 RHR2<br>SUC2 LYS1 RPE1 URA2 ACO2 BNA1 PGU1 YKL027W MAE1 MCD4 TRP3<br>URA1 ACS2 DPH5 ILV5 DUS3 YLR426W IMD3 ERG6 IMD4 ERG13 PLB2<br>ERG12 ADE4 SCW10 NRK1 SPS19 LYS9 DSE4 GPD2 LEU9 PRO2 ERG10<br>ALD6 TKL1 | 70 | 377 |
| sterol biosynthetic process<br>[GO:0016126]                                                                       | 1.4E-06 | ERG25 ERG11 ERG3 ERG6 HMG1 ERG13 ERG5 ERG2 ERG12 CYB5 MVD1<br>HES1 IDI1                                                                                                                                                                                                                                                                                                                           | 13 | 30  |
| steroid biosynthetic process<br>[GO:0006694]                                                                      | 1.5E-06 | ERG25 ERG11 ERG3 ERG6 HMG1 ERG13 ERG5 ERG2 ERG12 MVD1 HES1<br>IDI1                                                                                                                                                                                                                                                                                                                                | 12 | 26  |
| peptidyl-amino acid<br>modification [GO:0018193]                                                                  | 2.4E-06 | NCL1 PRS4 HMT1 ARO4 DUT1 FEN1 DTD1 PHO13 RLI1 UTP5 UTR2<br>MAK10 ARD1 PHO90 HAM1 LIA1 SUR4 OST6 APT1 URA5 GAS3 SEC63<br>ALG5                                                                                                                                                                                                                                                                      | 23 | 84  |
| alcohol metabolic process<br>[GO:0006066]                                                                         | 3.7E-06 | YAT1 ERG25 ATF2 ERG11 YEH1 ERG3 ACS2 ERG6 HMG1 ERG13 ERG5<br>ERG2 ERG12 CYB5 MVD1 ERG10 IDI1                                                                                                                                                                                                                                                                                                      | 17 | 52  |
| endonucleolytic cleavage in<br>ITS1 to separate SSU-rRNA<br>from 5.8S rRNA and LSU-rRNA<br>from tricistronic rRNA | 1.0E-05 | ENP1 PWP2 NOP14 LOC1 RPS0A NOP9 UTP18 UTP10 DIP2 EMG1 UTP13<br>RPS18B ESF2 RRS1 NOP58                                                                                                                                                                                                                                                                                                             | 15 | 45  |

transcript (SSU-rRNA, 5.8S  
rRNA, LSU-rRNA) [GO:0000447]

|                                                                     |         |                                                                                                                                                                                                                                                                                                                                                                                                                                                                             |    |     |
|---------------------------------------------------------------------|---------|-----------------------------------------------------------------------------------------------------------------------------------------------------------------------------------------------------------------------------------------------------------------------------------------------------------------------------------------------------------------------------------------------------------------------------------------------------------------------------|----|-----|
| translational elongation<br>[GO:0006414]                            | 2.7E-05 | BNA4 AAC3 ADH5 CTP1 ILV6 APA1 BSC1 PRM7 RPP1B GGC1 PAD1 GLY1<br>HPA3 DLD3 HOM3 PTC2 TRP2 WWM1 IRC7 MF(ALPHA)2 SCS3 SUT1<br>MIG2 BUD9 PTI1 INM1 TIM44 POR2 PAN6 LYS1 PRY3 ARG3 ESS1 SFK1<br>TEF4 HOT13 EAP1 SSA2 NEJ1 DIC1 HXT2 SSO2 DSK2 RNH201 DSE4 ARG1<br>GPD2 HPF1 NRT1 HIS3 FIT2 ALD6 DIP5 DPM1                                                                                                                                                                        | 54 | 322 |
| RNA modification<br>[GO:0009451]                                    | 4.0E-05 | MAK16 HMT1 ENP1 SPB1 RSA4 RPC53 TRM82 DBP3 YVH1 ALB1 CBF5<br>DUS3 TSR2 GCD10 TRM11 PUS7 RRS1 PUS1                                                                                                                                                                                                                                                                                                                                                                           | 18 | 67  |
| pyrimidine nucleotide<br>biosynthetic process<br>[GO:0006221]       | 4.5E-05 | URA7 URA3 DCD1 URA2 URA8 URA1 URA4 URA5                                                                                                                                                                                                                                                                                                                                                                                                                                     | 8  | 16  |
| glutamine metabolic process<br>[GO:0006541]                         | 5.4E-05 | URA7 HIS7 ASN2 URA2 URA8 TRP3 YML096W GUA1 ADE4 ASN1                                                                                                                                                                                                                                                                                                                                                                                                                        | 10 | 25  |
| lipid biosynthetic process<br>[GO:0008610]                          | 9.1E-05 | FEN1 ERG25 ERG11 SFK1 ERG3 SUR4 ERG6 HMG1 ERG13 ERG5 ERG2<br>ERG12 MVD1 HES1 IDI1                                                                                                                                                                                                                                                                                                                                                                                           | 15 | 53  |
| ergosterol biosynthetic process<br>[GO:0006696]                     | 2.3E-04 | ERG25 ERG11 ERG3 ERG6 HMG1 ERG13 ERG5 ERG2 ERG12 ERG10                                                                                                                                                                                                                                                                                                                                                                                                                      | 10 | 29  |
| GMP biosynthetic process<br>[GO:0006177]                            | 3.9E-04 | IMD2 IMD3 IMD4 GUA1                                                                                                                                                                                                                                                                                                                                                                                                                                                         | 4  | 5   |
| lysine biosynthetic process<br>[GO:0009085]                         | 4.3E-04 | LYS2 LYS21 LYS4 LYS12 LYS1 LYS9                                                                                                                                                                                                                                                                                                                                                                                                                                             | 6  | 12  |
| cellular amino acid metabolic<br>process [GO:0006520]               | 4.3E-04 | THR4 ASP1 GLY1 ILV1 IRC7 ARG3 URA2 MAE1 AAT1 ASP3-1                                                                                                                                                                                                                                                                                                                                                                                                                         | 10 | 31  |
| translation [GO:0006412]                                            | 4.4E-04 | MAK16 FUN12 ILS1 RPS11B RPG1 GRS1 RPS9B SRO9 RPL13A RPP1B<br>RPL41A DTD1 SSB1 RPL4B SES1 RPS11A KRS1 RLI1 RPS17B RPL12A<br>TMA20 RPL34A RPS8B RPS26B FRS2 RPL22B RPL9A YGR054W VAS1<br>RPL24B TIF4631 TYS1 RPS0A MES1 RPL14B DED81 YHR020W RPS24B<br>THS1 RPL17B RPS22A SUI2 RPL43B TEF4 GCN3 RPL40B DPS1 RLP24 FRS1<br>RPL31B RPS1A RPL6B RPS18B RPL6A TIF34 RPL36A RPS10B NIP1 SSB2<br>YNL247W RPL18B WRS1 RPL18A RPS19A RPS28A GLN4 RPS10A PRT1<br>RPS9A CDC60 TIF5 TIF3 | 72 | 511 |
| aromatic amino acid family<br>biosynthetic process<br>[GO:0009073]  | 3.5E-03 | ARO4 TRP4 TRP2 TRP5 ARO2 TRP3 ARO7                                                                                                                                                                                                                                                                                                                                                                                                                                          | 7  | 22  |
| lysine biosynthetic process via<br>amino adipic acid [GO:0019878]   | 3.6E-03 | LYS2 LYS21 LYS4 LYS1 LYS9                                                                                                                                                                                                                                                                                                                                                                                                                                                   | 5  | 12  |
| de novo NAD biosynthetic<br>process from tryptophan<br>[GO:0034354] | 7.6E-03 | BNA4 BNA1 BNA2                                                                                                                                                                                                                                                                                                                                                                                                                                                              | 3  | 5   |

**k** refers to the number of differentially expressed genes annotated with the GO term.

**f** refers to the total number of genes present in the yeast genome annotated with the GO term.
