# Supplementary material
Source: PubMed Central journal article supplement (PMC3249374)
Supplement: supp_111.132720_TableS8.pdf [file supp_111.132720_TableS8.pdf]

**Table S8 GO categorisation of differentially expressed transcripts with a fold change less than or equal to -2 (i.e. down-regulated genes).**

| Category                                        | p-value | In Category from Cluster                                                                                                                                                                                                                                                                                                                                                                                                                                                                                                                                                                                                                                                                                                                                                                                                                                                                                                                                                                                                                                                                                                                                                                                                                                                                                                                                                                                                                                                                                                                                                                                                                                                                                                                                                                                                                                                                                                                                                                                                                                                                                                                                                                                                                         | k  | f   |
|-------------------------------------------------|---------|--------------------------------------------------------------------------------------------------------------------------------------------------------------------------------------------------------------------------------------------------------------------------------------------------------------------------------------------------------------------------------------------------------------------------------------------------------------------------------------------------------------------------------------------------------------------------------------------------------------------------------------------------------------------------------------------------------------------------------------------------------------------------------------------------------------------------------------------------------------------------------------------------------------------------------------------------------------------------------------------------------------------------------------------------------------------------------------------------------------------------------------------------------------------------------------------------------------------------------------------------------------------------------------------------------------------------------------------------------------------------------------------------------------------------------------------------------------------------------------------------------------------------------------------------------------------------------------------------------------------------------------------------------------------------------------------------------------------------------------------------------------------------------------------------------------------------------------------------------------------------------------------------------------------------------------------------------------------------------------------------------------------------------------------------------------------------------------------------------------------------------------------------------------------------------------------------------------------------------------------------|----|-----|
| vacuolar protein catabolic process [GO:0007039] | <1e-14  | ACS1 BDH2 VID24 TPS1 NGR1 SDS24 HBT1 GYP7 NTH1 RCR2 REG1 UBC5 TPS2 KIN1 GGA1 TSA2 PEX29 GLC3 UBC8 EDC2 PIC2 GIP2 SSA4 SPI1 HSP12 RIM15 CMK1 PMC1 AMS1 ATG1 MDS3 VID30 STF2 CTT1 XKS1 SOL4 COQ6 HUA1 SOD2 GRE3 VID28 PIG2 FYV10 PFK26 GUT2 GTT1 BBC1 TPK1 PTK2 KNS1 HSP104 VPS13 TFS1 GSY2 TSL1 YPK2 PGM2 GID8 RIM11 SIP5 ALD3 ALD2 DDR48 PAI3 GAD1 TPS3 UBP15 MAM3 ATG19 DCS2 GSP2 YDC1 PIN3 GPH1 GDB1                                                                                                                                                                                                                                                                                                                                                                                                                                                                                                                                                                                                                                                                                                                                                                                                                                                                                                                                                                                                                                                                                                                                                                                                                                                                                                                                                                                                                                                                                                                                                                                                                                                                                                                                                                                                                                           | 75 | 129 |
| autophagy [GO:0006914]                          | <1e-14  | SEC17 ATG8 ATG14 ATG12 SAF1 ATG15 RPN4 ATG20 IWR1 ATG9 RRI1 GYP7 RCR2 CIS1 NRG1 UBC5 DOA4 KIN1 MFB1 RMD5 PIB1 UBX5 PEX29 UBC8 EDC2 AST2 RAD4 ATG18 PMC1 MON1 AMS1 CUP2 ATG1 VID30 NQM1 TAM41 RAD2 HSE1 ATG7 NVJ1 PIG2 FYV10 PFK26 HOS4 SNX4 TAX4 FBP26 TPK1 RAD26 IRS4 ECM4 ATG10 APC9 CLF1 PUS5 TFS1 ATG26 VPS34 NDL1 ATG17 RSF1 HFD1 GID8 PSO2 ATG16 ALD2 PAI3 RAD14 ATG4 ATG2 ATG19 PKH2 AHC1 SHE4 PEP12 GLO4 VAM3 DCS2 DGA1 ATG21 ATG29 ATG11 ATG13                                                                                                                                                                                                                                                                                                                                                                                                                                                                                                                                                                                                                                                                                                                                                                                                                                                                                                                                                                                                                                                                                                                                                                                                                                                                                                                                                                                                                                                                                                                                                                                                                                                                                                                                                                                          | 83 | 151 |
| cell death [GO:0008219]                         | 5.1E-14 | COR1 ATP1 ATP3 COX9 INH1 SDH4 ATP5 ATP17 QCR7 RIP1 QCR6 COX4 QCR9 QCR10 COX6 UBX6 QCR8 ATP2 ATP7 SDH1 SDH2 COX8 COX5A CYT1 PIN3 QCR2                                                                                                                                                                                                                                                                                                                                                                                                                                                                                                                                                                                                                                                                                                                                                                                                                                                                                                                                                                                                                                                                                                                                                                                                                                                                                                                                                                                                                                                                                                                                                                                                                                                                                                                                                                                                                                                                                                                                                                                                                                                                                                             | 26 | 29  |
| response to temperature stimulus [GO:0009266]   | 2.0E-13 | BDH2 HSP26 TPS1 SDS24 NTH1 UBC5 TPS2 HSP42 HSP78 SPI1 HSP12 CTT1 SOL4 SPL2 ECM4 HSP104 TFS1 TMA10 TSL1 MSC1 PGM2 ALD3 GIP4 GIP1 VPS15 IRA1 ICS2 LRE1 GPR1 STP4 BDF2 MRK1 MSH5 YDL180W SNF3 PRR2 RRI1 MFB1 MTH1 DOT6 RIM15 SAP155 EDC1 CPD1 MGA1 HXT4 RPI1 POG1 TAX4 GSH1 ASG7 HXT8 YJR115W HAP4 YKR017C SPO75 COX19 VPS13 GAL2 RFX1 CRR1 YLR446W FMP27 SRT1 CAT8 YNL144C ATG2 YNR034W-A AEP3 RDS2 PUF2                                                                                                                                                                                                                                                                                                                                                                                                                                                                                                                                                                                                                                                                                                                                                                                                                                                                                                                                                                                                                                                                                                                                                                                                                                                                                                                                                                                                                                                                                                                                                                                                                                                                                                                                                                                                                                           | 22 | 23  |
| energy reserve metabolic process [GO:0006112]   | 3.1E-13 | FUN14 FUN19 AIM2 BDH2 UIP3 YAR028W YAR029W YBL029C-A YBL029W MOH1 SEF1 YBL086C YBL095W EDS1 RFS1 YBR053C YRO2 YBR063C YBR085C-A YBR090C AIM3 OPY1 RTC2 APD1 ICS2 YBR182C-A YBR200W-A YBR204C YBR219C YBR221W-A YBR225W OM14 YBR230W-A ERT1 MTC4 AIM5 FMP21 BIT2 YBR284W YBR285W YBR287W YCL012C YCL021W-A YCL057C-A YCR007C CTR86 YCR076C HMRA2 YCR108C YDL027C STP4 BDF2 UBX3 TMA17 YDL114W SNA4 YDL133W UGX2 YDL180W RTN2 YDL206W YDL218W YDL233W YDR034W-B YDR042C RTR2 FMP16 ALT2 YDR124W YDR169C-A YDR182W-A YDR186C YDR246W-A YDR249C YDR262W BSC2 YDR282C HRQ1 YDR357C YDR366C YDR379C-A YDR381C-A YDR391C THI74 YDR444W JIP4 SPG3 PSP1 YDR506C SNA2 KRE28 HSP31 YDR541C VAB2 YEL020C UTR5 RMD6 YEL073C YEL076C PHM8 HVG1 YER039C-A SAP1 RRT13 RGI1 YER078W-A YER079W AST2 YER137C YER158C YER175W-A FMP10 YER184C YFL012W YFL034W YFL041W-A YFL042C COS4 YFL064C AIM13 YFR012W-A YFR016C YFR017C PES4 RMD8 YGL006W-A YGL007C-A YGL010W YGL081W TOS8 SNT2 RRT6 AIM14 YGL176C MTC3 SHE10 YGL235W YGL258W-A YPS5 YGR016W YGR021W NQM1 FMP48 YGR053C YGR066C YGR067C YGR079W YGR093W YGR121W-A YGR125W YGR126W YGR127W YGR130C ECL1 YGR146C-A YGR153W YGR174W-A YGR201C YGR204C-A YGR205W YGR235C SPG1 YGR237C YGR250C HUA1 YHL012W YLF2 YHL015W-A YHL018W YHL026C YHL048C-A YHR007C-A YSC83 YHR033W YHR035W YHR050W-A YHR078W YHR080C YHR097C YPT35 ANS1 YHR140W YSP1 LIN1 YHR159W AIM18 AIM46 YHR202W YIL024C YIL029C YIL055C YIL060W YIL077C AIM19 YIL089W YIL102C OM45 YIR014W YIR016W YIR018C-A PET130 IKS1 MPM1 YJL070C ICS3 YJL077W-B PRY1 IML2 AIM23 YJL132W YJL136W-A YJL147C DAS1 FMP33 YJL163C YJL181W YJL185C YJL193W YJL206C REE1 YJR005C-A YJR008W YJR039W HIT1 YJR056C YJR061W AIM24 YJR085C YJR112W-A YJR115W IML1 YJR149W DAN4 YJR151W-A YJR154W YKL018C-A YKL023W YKL050C YKL068W-A YKL070W YKL071W STB6 CUE2 YKL091C MTC2 YKL100C YKL106C-A YKL107W DGR2 RMA1 YKL133C MRP8 YKL151C YKL162C KKQ8 YKL222C YKR005C YKR011C YKR017C YKR018C FMP46 YKR051W YKR096W UBP11 YLL056C YLL066W-B YLR001C YLR030W YLR031W YLR046C YLR049C YLR053C YLR125W YLR149C PCD1 YLR152C RRT15 YLR164W YLR173W YLR177W SKG3 IRC20 YLR257W BOP2 YLR283W YLR297W YLR312C TMA10 STP3 ART10 YLR422W YLR445W YLR446W FMP27 YLR466C-B YML002W YML003W | 49 | 89  |
| biological_process [GO:0008150]                 | 5.7E-13 | YML007C-A YML020W AIM31 YML037C PRM6 AIM32 TCB3 AIM33 YML100W-                                                                                                                                                                                                                                                                                                                                                                                                                                                                                                                                                                                                                                                                                                                                                                                                                                                                                                                                                                                                                                                                                                                                                                                                                                                                                                                                                                                                                                                                                                                                                                                                                                                                                                                                                                                                                                                                                                                                                                                                                                                                                                                                                                                   | 44 | 123 |
|                                                 |         |                                                                                                                                                                                                                                                                                                                                                                                                                                                                                                                                                                                                                                                                                                                                                                                                                                                                                                                                                                                                                                                                                                                                                                                                                                                                                                                                                                                                                                                                                                                                                                                                                                                                                                                                                                                                                                                                                                                                                                                                                                                                                                                                                                                                                                                  | 7  | 7   |

|                                                                     |         |                                                                                                                                                                                                                                                                                                                                                                                                                                                                                                                                                                                                                                                                                                                                                                                                                                                                                                                                                                                                                                                                                |    |     |
|---------------------------------------------------------------------|---------|--------------------------------------------------------------------------------------------------------------------------------------------------------------------------------------------------------------------------------------------------------------------------------------------------------------------------------------------------------------------------------------------------------------------------------------------------------------------------------------------------------------------------------------------------------------------------------------------------------------------------------------------------------------------------------------------------------------------------------------------------------------------------------------------------------------------------------------------------------------------------------------------------------------------------------------------------------------------------------------------------------------------------------------------------------------------------------|----|-----|
|                                                                     |         | A NAB6 NGL3 YML131W YMR018W YMR031C YMR034C YET2 YMR084W YMR085W YMR090W YMR105W-A SPG4 YMR114C YMR118C YMR124W YMR155W YMR158C-A YMR160W SIP18 YMR175W-A YMR178W YMR181C YMR182W-A YMR185W SPG5 ICY1 YMR196W YMR206W YMR252C YMR253C YMR258C YMR262W YMR265C PGM3 YMR295C SNO4 ERR3 YNL011C YNL033W YNL040W YNL042W-B APJ1 YNL092W AIM37 YNL115C YNL144C YNL146C-A YNL155W YNL165W YNL176C YNL193W YNL195C SLZ1 YNL200C VID27 YNL234W YTP1 RTC4 YNL260C BSC4 YNL277W-A YNL295W YNL305C SWM2 YNR034W-A YNR068C BSC5 IRC10 YOLO24W YOLO36W RRT8 AIM39 YOLO73C PHM7 YOLO87C RTC1 ZPS1 YOL159C YOR011W-A YOR032W-A YOR034C-A IRC23 YOR052C RTS2 TCB1 YOR097C YOR152C PNS1 YOR161C-C YOR186W YOR192C-C YOR214C AIM41 RCN2 YOR223W YOR228C RDL1 YOR289W YOR292C YOR293C-A YOR316C-A MNE1 YOR365C YOR376W-A YOR381W-A FRE5 YOR389W PAU21 YPL038W-A YPL039W LEE1 CWC27 YTA6 YPL077C YPL107W YPL109C YPL119C-A PRM4 YPL162C SET6 YPL168W UIP4 FMP40 GRE1 YPL236C YPL247C YPL257W YPL260W YPL277C YPL278C YPRO22C JID1 ASA1 YPRO91C YPRO98C YPR109W YPR117W YPR127W URN1 CUR1 YPR159C-A |    |     |
| phosphorus metabolic process [GO:0006793]                           | 3.6E-12 | COR1 ATP1 PKC1 ATP3 ATP16 MPS1 STE7 INH1 SDH4 ATP5 ATP17 QCR7 RIP1 COX13 QCR9 QCR10 COX6 KIC1 PBS2 QCR8 ATP2 ATP7 MDH1 SDH3 SDH1 SDH2 COX12 RIM11 COX7 FPK1 CYT1 ATP4 ATP20 QCR2                                                                                                                                                                                                                                                                                                                                                                                                                                                                                                                                                                                                                                                                                                                                                                                                                                                                                               | 34 | 48  |
| mitochondrion degradation [GO:0000422]                              | 2.8E-10 | ATG8 ATG12 PTC6 ATG20 ATG9 CIS1 ATG1 ATG7 ATG32 SNX4 FCJ1 ATG10 ATG33 ATG17 ATG16 ATG4 ATG2 YOR019W ATG21 ATG29 ICY2 ATG11 ATG13 PET9 COR1 ATP1 ATP3 ATP16 COX9 INH1 SDH4 RAV2 ATP5 ATP17 URC2 QCR7 APA2 RIP1 PRS2 QCR6 PMC1 COX4 COX13 QCR9 QCR10 COX6 QCR8 RAV1 ATP2 ATP7 MDH1 SDH3 SDH1 SDH2 COX12 ATP14 COX8 ATP18 STV1 COX7 COX5A CYT1 ATP4 ATP15 ATP20 QCR2                                                                                                                                                                                                                                                                                                                                                                                                                                                                                                                                                                                                                                                                                                              | 23 | 29  |
| nucleotide metabolic process [GO:0009117]                           | 1.2E-09 | COR1 ATP3 COX9 INH1 SDH4 ATP5 ATP17 QCR7 COX4 BIO2 QCR8 ATP7 MDH1 SDH2 CIT1 ISU1 QCR2                                                                                                                                                                                                                                                                                                                                                                                                                                                                                                                                                                                                                                                                                                                                                                                                                                                                                                                                                                                          | 43 | 78  |
| cofactor metabolic process [GO:0051186]                             | 1.8E-09 | OAF1 SEF1 GIP1 REG2 MUM2 SPO23 UBX7 SNT1 BDF2 FMP45 ADY3 NTH1 REG1 DOA4 SPO71 SAC6 RMD5 DON1 ZIP1 XRS2 DIT1 RMD6 GPA2 MEI4 GIP2 SHC1 SPR6 DMC1 PES4 RMD8 RIM8 ATG1 IME4 HOS2 MDS3 SEC9 GSC2 SPR3 AMA1 SPO11 SPS100 SSP1 PIG2 SPO22 SGA1 SLM1 HOS4 ATG32 BBC1 LOH1 UBX6 GSM1 YAK1 TPK1 CDC16 SPO14 TGL4 SPO75 KNS1 OSW2 CRR1 LOH1 CDC25 BDF1 SMA2 MSC1 SPO20 RIM11 FKS3 SPS18 SHE4 MPC54 GAC1 SPR1 SMA1 LGE1 CSM4 CSR2                                                                                                                                                                                                                                                                                                                                                                                                                                                                                                                                                                                                                                                          | 17 | 19  |
| sporulation resulting in formation of a cellular spore [GO:0030435] | 6.9E-09 | ATG8 ATG14 ATG12 ATG15 ATG9 CIS1 ATG18 ATG1 VAM7 ATG7 SNX4 ATG10 ATG17 ATG16 ATG4 ATG2 VAM3 ATG21 ATG29 ATG11 ATG13 PET9 COR1 ATP1 ATP3 YRO2 FTH1 YBR241C PCA1 HSP30 ATP16 MCH1 COX9 INH1 YDL206W ENA5 SDH4 ATP5 TIM11 ATP17 YDR506C QCR7 FIT1 RIP1 FET5 QCR6 PMC1 PMR1 COX4 COX13 QCR9 DUR3 ARN1 QCR10 COX6 CTR2 TOK1 KHA1 TRK1 QCR8 ATP2 ATP7 MDH1 SDH3 SDH1 ZRT3 SDH2 FRE6 COX12 FRE8 NHA1 ATP14 COX8 ATP18 STV1 COX7 COX5A ATO2 MAM3 ATP19 CYT1 FRE3 FIT3 FRE5 PMA2 YPL060W ATP4 ATP15 ATP20 QCR2                                                                                                                                                                                                                                                                                                                                                                                                                                                                                                                                                                          | 78 | 185 |
| piecemeal microautophagy of nucleus [GO:0034727]                    | 4.1E-07 | COR1 GRX1 TRX3 SDH4 ARH1 GRX2 QCR7 RIP1 QCR6 OLE1 QCR9 QCR10 YJL045W QCR8 SDH3 SDH1 SDH2 FRE6 FRE8 YLR164W ERO1 YMR118C CYT1 FRE3 FRE5 QCR2                                                                                                                                                                                                                                                                                                                                                                                                                                                                                                                                                                                                                                                                                                                                                                                                                                                                                                                                    | 21 | 32  |
| ion transport [GO:0006811]                                          | 4.5E-06 | ATP1 ATP3 PCA1 ATP16 ENA5 ATP5 TIM11 ATP17 PMC1 PMR1 ATP2 ATP7 ATP14 ATP18 ATP19 PMA2 ATP15 ATP20                                                                                                                                                                                                                                                                                                                                                                                                                                                                                                                                                                                                                                                                                                                                                                                                                                                                                                                                                                              | 69 | 181 |
| electron transport chain [GO:0022900]                               | 1.5E-05 | ATG8 ATG14 ATG12 ATG20 ATG9 ATG18 ATG1 ATG7 SNX4 TAX4 IRS4 ATG10 ATG16 ATG4 ATG2 ATG19 ATG21 ATG11 ATG13 OAF1 HAP3 SEF1 EDS1 ERT1 THI2 MAL33 SRD1 HMRA2 MBP1 ARO80 CAD1 URC2 SWI4 YER184C GAT1 RIM15 PDR1 HSF1 TOS8 CUP2 HOS2 HAP2 MGA1 STB5 SKN7 CST6 XBP1 MET28 YAP5 GSM1 YJL206C RGT1 HAP4 YKL222C GAT3 RFX1 HAP1 YAP1 ARG81 MAC1 GAT2 CAT8 MET4 HAL9 CIN5 AZF1 SFL1 YRR1 YRM1 SAS5 PIP2 RDR1 ECM23 RDS2 SPP1 HAA1 SUA7                                                                                                                                                                                                                                                                                                                                                                                                                                                                                                                                                                                                                                                     | 26 | 51  |
| ATP biosynthetic process [GO:0006754]                               | 3.3E-05 | TPS1 NTH1 REG1 GLC3 GIP2 PCL10 PIG2 PCL7 YAK1 TPK1 GLG1 GSY2 PGM2 GAC1 GPH1                                                                                                                                                                                                                                                                                                                                                                                                                                                                                                                                                                                                                                                                                                                                                                                                                                                                                                                                                                                                    | 18 | 31  |
| CVT pathway [GO:0032258]                                            | 7.2E-05 | VID24 RMD5 UBC8 VID30 VID28 FYV10 GID8                                                                                                                                                                                                                                                                                                                                                                                                                                                                                                                                                                                                                                                                                                                                                                                                                                                                                                                                                                                                                                         | 19 | 35  |
| regulation of transcription, DNA-dependent [GO:0006355]             | 4.2E-04 |                                                                                                                                                                                                                                                                                                                                                                                                                                                                                                                                                                                                                                                                                                                                                                                                                                                                                                                                                                                                                                                                                | 58 | 166 |
| energy reserve metabolic process [GO:0006112]                       | 5.0E-04 |                                                                                                                                                                                                                                                                                                                                                                                                                                                                                                                                                                                                                                                                                                                                                                                                                                                                                                                                                                                                                                                                                | 15 | 28  |
| negative regulation of gluconeogenesis [GO:0045721]                 | 8.6E-04 |                                                                                                                                                                                                                                                                                                                                                                                                                                                                                                                                                                                                                                                                                                                                                                                                                                                                                                                                                                                                                                                                                | 7  | 9   |

|                                                                              |         |                                                                                                                                                                                               |    |    |
|------------------------------------------------------------------------------|---------|-----------------------------------------------------------------------------------------------------------------------------------------------------------------------------------------------|----|----|
| aerobic respiration<br>[GO:0009060]                                          | 1.1E-03 | PET9 COR1 ETR1 DLD1 PET100 COX20 QCR7 RIP1 RPO41 QCR6 COX4 COX13<br>SHY1 QCR9 QCR10 QCR8 CBP1 MDH1 MBR1 PET10 HAP1 RSF1 AAC1 ISF1<br>PAH1 NCA2 QCR2                                           | 27 | 66 |
| fatty acid metabolic<br>process [GO:0006631]                                 | 1.4E-03 | OAF1 AGP2 FAA2 YAT2 POX1 POT1 MGA2 SPT23 FOX2 ECI1 CAT2 IZH2 CRC1<br>DCI1 FAA1 PIP2                                                                                                           | 16 | 33 |
| ubiquitin-dependent<br>endocytosis<br>[GO:0070086]                           | 1.7E-03 | RSP5 ROG3 RIM8 ART5 ALY2 ALY1 LDB19 CSR2                                                                                                                                                      | 8  | 12 |
| response to toxin<br>[GO:0009636]                                            | 2.0E-03 | PRX1 AAD3 AAD4 HSP31 GTO1 AAD10 CYT2 ECM4 SUL2 GTO3 AAD14 IZH2<br>GRE2 PDR10 FRE3                                                                                                             | 15 | 31 |
| cristae formation<br>[GO:0042407]                                            | 3.3E-03 | TIM11 FCJ1 UPS2 ATP14 ATP20<br>PSK1 GPB2 PKC1 IRA1 COS111 ERT1 GPR1 SNF3 MTH1 SAC7 GPA2 STE2 CMK1<br>GPG1 SIP2 GPA1 PKP1 CYR1 TOR1 TUS1 PSK2 IRA2 RTS1 BAG7 GSP2 GPB1<br>RDS2 MKK2 PLC1 TIP41 | 5  | 6  |
| signal transduction<br>[GO:0007165]                                          | 4.6E-03 |                                                                                                                                                                                               | 30 | 82 |
| autophagic vacuole<br>assembly [GO:0000045]                                  | 5.0E-03 | ATG8 ATG12 ATG9 ATG1 ATG17 ATG4 ATG2                                                                                                                                                          | 7  | 11 |
| macroautophagy<br>[GO:0016236]                                               | 6.0E-03 | VPS15 ATG14 ATG12 PTC6 ATG20 ATG18 ATG7 ATG10 ATG16 ATG21 ATG29<br>ATG13                                                                                                                      | 12 | 25 |
| DNA metabolic process<br>[GO:0006259]                                        | 6.6E-03 | MMS4 DMC1 SPO11 CST6 TOP3 MEC3 TOP2 RAD1                                                                                                                                                      | 8  | 14 |
| cellular ion homeostasis<br>[GO:0006873]                                     | 6.6E-03 | FYV5 CRD1 MDM31 PTK2 GIS4 SKY1 MDM32 HRK1                                                                                                                                                     | 8  | 14 |
| lipid metabolic process<br>[GO:0006629]                                      | 7.0E-03 | ATG15 YDL109C YDR444W FAA2 YAT2 OLE1 POX1 POT1 TAX4 FOX2 IRS4 TGL4<br>ECI1 CAT2 TGL3 IZH2 DCI1 DGA1 FAA1 GDE1 PGC1 PLC1                                                                       | 22 | 57 |
| negative regulation of Ras<br>protein signal<br>transduction<br>[GO:0046580] | 9.4E-03 | GPB2 IRA1 AVO1 IRA2 GPB1                                                                                                                                                                      | 5  | 7  |
