# Supplementary material
Source: PubMed Central journal article supplement (PMC3249374)
Supplement: supp_111.132720_TableS9.pdf [file supp_111.132720_TableS9.pdf]

**Table S9 Fold changes of genes involved in fermentation and amino acid catabolism for the SOK2 overexpressing strain versus control.**

| Systematic name | Gene name | Functional Description                                                                                      | SOK vs Control |
|-----------------|-----------|-------------------------------------------------------------------------------------------------------------|----------------|
| YJR155w         | AAD10     | Putative aryl-alcohol dehydrogenase                                                                         | -4.17          |
| YNL331c         | AAD14     | Putative aryl-alcohol dehydrogenase                                                                         | -2.33          |
| YCR107w         | AAD3      | Putative aryl-alcohol dehydrogenase                                                                         | -1.57          |
| YDL243c         | AAD4      | Putative aryl-alcohol dehydrogenase                                                                         | -1.60          |
| YGL256w         | ADH4      | alcohol dehydrogenase IV                                                                                    | 3.10           |
| YBR145w         | ADH5      | alcohol dehydrogenase V                                                                                     | 1.57           |
| YMR170c         | ALD2      | aldehyde dehydrogenase 2 (NAD <sup>+</sup> )                                                                | -1.82          |
| YMR169c         | ALD3      | stress inducible aldehyde dehydrogenase                                                                     | -11.49         |
| YPL061w         | ALD6      | aldehyde dehydrogenase, cytosolic                                                                           | 1.69           |
| YGL148w         | ARO2      | chorismate synthase                                                                                         | 2.31           |
| YBR249c         | ARO4      | 2-dehydro-3-deoxyphosphoheptonate aldolase, catalyzes the first step in aromatic amino acid biosynthesis    | 3.35           |
| YGL202w         | ARO8      | Aromatic aminotransferase, expression is regulated by general control of amino acid biosynthesis            | 2.18           |
| YHR137w         | ARO9      | Aromatic aminotransferase, catalyzes the first step of tryptophan, phenylalanine, and tyrosine catabolism   | -2.05          |
| YDR380w         | ARO10     | Phenylpyruvate decarboxylase, catalyzes the first specific step in the Ehrlich pathway                      | -3.02          |
| YGR177C         | ATF2      | Alcohol acetyltransferase, forms volatile esters during fermentation                                        | 4.38           |
| YCL064c         | CHA1      | L-serine/L-threonine deaminase, catalyzes the degradation of both L-serine and L-threonine                  | 3.33           |
| YDL174c         | DLD1      | D-lactate dehydrogenase, oxidizes D-lactate to pyruvate                                                     | -2.52          |
| YEL071w         | DLD3      | D-lactate dehydrogenase                                                                                     | 3.06           |
| YEL066W         | HPA3      | D-Amino acid N-acetyltransferase, catalyzes N-acetylation of D-amino acids                                  | 2.29           |
| YER086w         | ILV1      | Threonine deaminase, catalyzes the first step in isoleucine biosynthesis                                    | 1.97           |
| YMR108w         | ILV2      | Acetolactate synthase, catalyses the first common step in isoleucine and valine biosynthesis                | 1.50           |
| YLR355c         | ILV5      | Acetohydroxyacid reductoisomerase, mitochondrial protein involved in branched-chain amino acid biosynthesis | 1.58           |
| YCL009c         | ILV6      | Regulatory subunit of acetolactate synthase                                                                 | 1.62           |
| YOR108w         | LEU9      | 2-Isopropylmalate synthase, catalyzes the first step in the leucine biosynthesis pathway                    | 2.32           |
| YDR081c         | PDC2      | pyruvate decarboxylase regulatory protein                                                                   | -1.51          |

|         |       |                                                                                                 |       |
|---------|-------|-------------------------------------------------------------------------------------------------|-------|
| YLR134w | PDC5  | pyruvate decarboxylase, isozyme 2                                                               | -2.21 |
| YGR087c | PDC6  | pyruvate decarboxylase 3                                                                        | -5.09 |
| YPR026w | ATH1  | acid trehalase, vacuolar                                                                        | -3.40 |
| YDR001c | NTH1  | neutral trehalase (alpha,alpha-trehalase)                                                       | -2.20 |
| YBR001c | NTH2  | alpha,alpha-trehalase                                                                           | -3.92 |
| YKL127w | PGM1  | phosphoglucomutase, minor isoform                                                               | 3.03  |
| YMR105c | PGM2  | phosphoglucomutase, major isoform                                                               | -1.85 |
| YBR126c | TPS1  | alpha,alpha-trehalose-phosphate synthase, 56 KD subunit                                         | -1.80 |
| YDR074w | TPS2  | alpha,alpha-trehalose-phosphate synthase, 102 KD subunit                                        | -2.45 |
| YMR261c | TPS3  | alpha,alpha-trehalose-phosphate synthase, 115 KD subunit                                        | -1.52 |
| YML100w | TSL1  | alpha,alpha-trehalose-phosphate synthase, 123 KD subunit                                        | -2.77 |
| YAL054c | ACS1  | acetyl-CoA synthetase                                                                           | -2.20 |
| YLR153c | ACS2  | acetyl-coenzyme A synthetase                                                                    | 2.17  |
| YPL028W | ERG10 | Acetyl-CoA C-acetyltransferase; involved in the first step in mevalonate biosynthesis           | 1.77  |
| YML126C | ERG13 | 3-hydroxy-3-methylglutaryl-CoA synthase, involved in the second step in mevalonate biosynthesis | 2.09  |
| YIL160C | POT1  | 3-ketoacyl-CoA thiolase involved in beta-oxidation of fatty acids                               | -4.82 |

---
